# Supplementary material for: Sex-Specific Cell Types and Molecular Pathways Indicate Fibro-Calcific Aortic Valve Stenosis
Source: Front Immunol. 2022 Feb 24;13:747714. doi: 10.3389/fimmu.2022.747714 (PMC8907138; doi:10.3389/fimmu.2022.747714)
Supplement: Supplementary file 3 [file DataSheet_3.xlsx]

## Sheet: TableS3
Cell type	adj pValue
Fibroblasts	1.76027e-06
Chondrocytes	1.80902e-06
Macrophages	8.78373e-06
Mesenchymal stem cells	8.78373e-06
Pericytes	4.73677e-05
Monocytes	0.000254556
B-cells	0.00316929
CD4+ T-cells	0.017847
CD8+ T-cells	0.017847
Osteoblast	0.017912
Naive B-cells	0.0201387
Plasmacytoid dendritic cells	0.0246293
Regulatory T-cells	0.0272056
Memory B-cells	0.0284066
Multipotent progenitors	0.0618299
Conventional dendritic cells	0.0628904
Neutrophils	0.117131
Platelets	0.155277
Activated dendritic cells	0.27628
Endothelial cells	0.29279
Adipocytes	0.345814
Natural killer T-cells	0.426369
Smooth muscle cells	0.583803
Dendritic cells	0.585014
Mast cells	0.760819
Plasma cells	0.760819
Skeletal muscle cells	0.834548
Common myeloid progenitors	0.996995
